# Supplementary material
Source: MDPI journal article supplement (https://www.mdpi.com/1424-8247/14/7/627)
Supplement: s1 [file s1]

**Therapeutic drug monitoring of antiseizure medications using volumetric absorptive  
microsampling: where are we?**

Annachiara D'Urso, Marcello Locatelli, Angela Tartaglia, Linda Molteni, Cristian D'Ovidio, Fabio Savini, James Rudge and Ugo de Grazia.

**Supplemental material**

**TABLE S1 Summary of stability studies**

Table S1a: Summary of short time stability studies

| Analyte                        | T (°C) | Percentage difference from day 1 (%) |          |                                      |      |      |
|--------------------------------|--------|--------------------------------------|----------|--------------------------------------|------|------|
|                                |        | D'Urso, A. et al, 2019 [30]          |          | Canisius T.P.I.J.M. et al, 2020 [28] |      |      |
|                                |        | %QC low                              | %QC high |                                      |      |      |
|                                |        | 10 d                                 |          | 2 d                                  | 3 d  | 1 w  |
| 10-OH-oxcarbazepine (10-OHOXC) | -20°   | -7.6                                 | -5.1     |                                      |      | <±15 |
|                                | +4°    | -9.5                                 | -5.2     |                                      |      |      |
|                                | +37°   | -12.6                                | -8.6     | <±15                                 |      |      |
|                                | +10°   | -4.1                                 | 2.3      |                                      |      |      |
|                                | RT     |                                      |          | <±15                                 | <±15 | >±15 |
| Brivaracetam (BRV)             | -20°   |                                      |          | >±15                                 |      |      |
|                                | +37°   |                                      |          |                                      |      | <±15 |
|                                | RT     |                                      |          | <±15                                 | <±15 | >±15 |
| Ethosuximide (ETS)             | -20°   | -8.7                                 | -8.4     |                                      |      |      |
|                                | +4°    | -11.7                                | -10.0    |                                      |      | <±15 |
|                                | +37°   | -14.5                                | -7.3     | <±15                                 |      |      |
|                                | +10°   | -5.0                                 | -3.3     |                                      |      |      |
|                                | RT     |                                      |          | <±15                                 | >±15 | >±15 |
| Felbamate (FBM)                | -20°   | 0.6                                  | 1.2      |                                      |      |      |
|                                | +4°    | 4.4                                  | -2.2     |                                      |      |      |
|                                | +37°   | -1.7                                 | -0.6     |                                      |      |      |
|                                | +10°   | -3.4                                 | -11.4    |                                      |      |      |
| Gabapentin (GBP)               | -20°   |                                      |          |                                      |      | <±15 |
|                                | +37°   |                                      |          | <±15                                 |      |      |
|                                | RT     |                                      |          | <±15                                 | <±15 | <±15 |
| Lacosamide (LCS)               | -20°   | -10.2                                | -3.9     |                                      |      | <±15 |
|                                | +4°    | -1.9                                 | -8.5     |                                      |      |      |
|                                | +37°   | -8.6                                 | -4.2     | <±15                                 |      |      |
|                                | +10°   | -2.0                                 | -11.4    |                                      |      |      |
|                                | RT     |                                      |          | <±15                                 | <±15 | <±15 |
| Levetiracetam (LEV)            | -20°   | -2.9                                 | -3.1     |                                      |      | <±15 |
|                                | +4°    | -3.6                                 | -4.0     |                                      |      |      |
|                                | +37°   | -6.2                                 | -0.7     | <±15                                 |      |      |
|                                | +10°   | -6.0                                 | -9.0     |                                      |      |      |
|                                | RT     |                                      |          | <±15                                 | <±15 | <±15 |
| Lamotrigine (LTG)              | -20°   | -9.5                                 | -3.0     |                                      |      | <±15 |
|                                | +4°    | -5.9                                 | -4.4     |                                      |      |      |
|                                | +37°   | -3.2                                 | -3.3     | <±15                                 |      |      |
|                                | +10°   | 2.2                                  | -9.5     |                                      |      |      |
|                                | RT     |                                      |          | <±15                                 | >±15 | >±15 |
| Oxcarbazepine (OXC)            | -20°   | 7.3                                  | -2.7     |                                      |      | <±15 |
|                                | +4°    | -13.1                                | 3.3      |                                      |      |      |
|                                | +37°   | -1.4                                 | -14.7    | <±15                                 |      |      |
|                                | +10°   | -3.5                                 | -8.4     |                                      |      |      |
|                                | RT     |                                      |          | >±15                                 | >±15 | >±15 |
| Perampanel (PMP)               | -20°   | -3.5                                 | -3.5     |                                      |      |      |
|                                | +4°    | 3.2                                  | 3.2      |                                      |      |      |
|                                | +37°   | -11.2                                | -11.2    |                                      |      |      |
|                                | +10°   | -3.3                                 | -0.5     |                                      |      |      |

|                     |      |       |       |      |      |      |
|---------------------|------|-------|-------|------|------|------|
| Pregabalin<br>(PGB) | -20° |       |       |      |      | <±15 |
|                     | +37° |       |       | <±15 |      |      |
|                     | RT   |       |       | <±15 | <±15 | >±15 |
| Primidone<br>(PRM)  | -20° | -0.4  | -9.4  |      |      | <±15 |
|                     | +4°  | 2.5   | -8.0  |      |      |      |
|                     | +37° | -2.4  | -4.8  | <±15 |      |      |
|                     | +10° | -3.0  | -3.4  |      |      |      |
|                     | RT   |       |       | <±15 | <±15 | >±15 |
| Rufinamide<br>(RFN) | -20° | -14.8 | -9.4  |      |      |      |
|                     | +4°  | -12.1 | -11.3 |      |      |      |
|                     | +37° | -12.9 | -6.8  |      |      |      |
|                     | +10° | -3.2  | -2.6  |      |      |      |
| Topiramate<br>(TPM) | -20° | -8.2  | -13.8 |      |      | <±15 |
|                     | +4°  | 3.0   | -9.9  |      |      |      |
|                     | +37° | -9.0  | -12.4 | <±15 |      |      |
|                     | +10° | 2.6   | -6.4  |      |      |      |
|                     | RT   |       |       | <±15 | <±15 | <±15 |
| Zonisamide<br>(ZNS) | -20° | -6.1  | -12.2 |      |      |      |
|                     | +4°  | -1.4  | -13.1 |      |      |      |
|                     | +37° | -1.2  | -14.1 |      |      |      |
|                     | +10° | 0.9   | -4.4  |      |      |      |

**Legend:** d) days; w) weeks; QC low) low level Quality Control; QC high) high level Quality Control. **Red bold numbers** represent numbers exceeding allowable stability limit (<±15). Data are expressed as mean percentage difference in concentration with respect to day 1.

Table S1b: Summary of long time stability studies

| Analyte                        | T (°C) | Percentage difference from day 1 (%) |          |         |          |         |          |                             |          |                                      |      |      |                             |          |         |          |
|--------------------------------|--------|--------------------------------------|----------|---------|----------|---------|----------|-----------------------------|----------|--------------------------------------|------|------|-----------------------------|----------|---------|----------|
|                                |        | Velghe, S., Stove C.P., 2018 [29]    |          |         |          |         |          | D'Urso, A. et al, 2019 [30] |          | Canisius T.P.I.J.M. et al, 2020 [28] |      |      | Velghe, S. et al, 2020 [26] |          |         |          |
|                                |        | 4 d                                  |          | 1 w     |          | 1 mo    |          | 10 d                        |          | 2 d                                  | 3 d  | 1 w  | 3 mo                        |          | 6 mo    |          |
|                                |        | %QC low                              | %QC high | %QC low | %QC high | %QC low | %QC high | %QC low                     | %QC high |                                      |      |      | %QC low                     | %QC high | %QC low | %QC high |
| Carbamazepine (CBZ)            | -20°   | -0.4                                 | -3.6     | -13.4   | -14.9    | -1.8    | 1.7      | -3.8                        | -9.3     |                                      |      | <±15 | 5.1                         | -1.5     | -5.5    | -4.9     |
|                                | +4°    | -0.3                                 | 4.7      | -13.9   | -13.5    | -3.6    | -0.9     | -5.2                        | 6.6      |                                      |      |      |                             |          |         |          |
|                                | +10°   |                                      |          |         |          |         |          | -0.7                        | 1.8      |                                      |      |      |                             |          |         |          |
|                                | RT     | -9.2                                 | -5.5     | -13.7   | -8.8     | -4.6    | 3.2      |                             |          | <±15                                 | <±15 | <±15 |                             |          |         |          |
|                                | +37°   |                                      |          |         |          |         |          | -6.6                        | 5.1      | <±15                                 |      |      |                             |          |         |          |
|                                | +60°   | -12.1                                | -5.1     | -10.9   | -12.3    | -10.8   | 0.9      |                             |          |                                      |      |      |                             |          |         |          |
| Carbamazepine -epoxide (CBZ-E) | -20°   | 17.5                                 | 0.0      | 5.0     | -0.8     | 5.1     | -0.2     | -9.9                        | -7.6     |                                      |      | >±15 |                             |          |         |          |
|                                | +4°    | 15.9                                 | 5.3      | 6.9     | -5.4     | 11.4    | -1.7     | -1.9                        | -9.5     |                                      |      |      |                             |          |         |          |
|                                | +10°   |                                      |          |         |          |         |          | -1.1                        | -4.1     |                                      |      |      |                             |          |         |          |
|                                | RT     | 7.5                                  | -4.3     | 5.9     | -0.1     | 4.0     | -4.1     |                             |          | <±15                                 | <±15 | <±15 |                             |          |         |          |
|                                | +37°   |                                      |          |         |          |         |          | -9.6                        | -12.6    | <±15                                 |      |      |                             |          |         |          |
|                                | +60°   | 2.9                                  | -9.2     | -5.9    | -15.3    | -23.6   | -26.1    |                             |          |                                      |      |      |                             |          |         |          |
| Phenobarbital (PB)             | -20°   | 8.3                                  | -6.2     | -3.1    | -11.8    | 13.2    | 7.4      | -7.4                        | -8.6     |                                      |      | <±15 | 12.5                        | 4.1      | -6.9    | -10.4    |
|                                | +4°    | 5.2                                  | -0.4     | -7.2    | -13.6    | 7.0     | 5.9      | 4.3                         | -2.0     |                                      |      |      |                             |          |         |          |
|                                | +10°   |                                      |          |         |          |         |          | 2.5                         | -3.3     |                                      |      |      |                             |          |         |          |
|                                | RT     | -5.3                                 | -6.2     | -6.0    | -10.5    | 5.1     | 0.3      |                             |          | <±15                                 | >±15 | >±15 |                             |          |         |          |
|                                | +37°   |                                      |          |         |          |         |          | 4.8                         | -2.4     | <±15                                 |      |      |                             |          |         |          |
|                                | +60°   | 0.0                                  | -7.8     | 0.6     | -13.0    | 15.5    | 6.8      |                             |          |                                      |      |      |                             |          |         |          |
| Phenytoin (PHT)                | -20°   | 1.5                                  | 10.0     | -6.1    | 5.2      | 9.5     | 7.4      | 4.3                         | 3.1      |                                      |      | >±15 |                             |          |         |          |
|                                | +4°    | -0.8                                 | 12.4     | -8.4    | 3.8      | 11.8    | 7.8      | -2.0                        | -0.4     |                                      |      |      |                             |          |         |          |
|                                | +10°   |                                      |          |         |          |         |          | -1.8                        | -2.8     |                                      |      |      |                             |          |         |          |
|                                | RT     | -8.4                                 | 4.2      | -8.3    | 9.6      | 11.9    | 9.2      |                             |          | <±15                                 | >±15 | >±15 |                             |          |         |          |
|                                | +37°   |                                      |          |         |          |         |          | -0.3                        | -4.9     | <±15                                 |      |      |                             |          |         |          |
|                                | +60°   | -4.9                                 | 3.0      | -10.3   | 2.3      | 11.0    | 13.3     |                             |          |                                      |      |      |                             |          |         |          |
| Valproic acid                  | -20°   | 12.1                                 | 0.3      | 11.8    | -4.4     | 15.5    | 17.6     |                             |          |                                      |      | <±15 | 15.2                        | 10.3     | -1.4    | -1.4     |

|       |             |      |      |      |      |             |             |  |  |      |      |      |  |  |  |  |
|-------|-------------|------|------|------|------|-------------|-------------|--|--|------|------|------|--|--|--|--|
| (VPA) | <b>+4°</b>  | 2.1  | 2.0  | 11.8 | -8.0 | <b>15.1</b> | <b>18.0</b> |  |  |      |      |      |  |  |  |  |
|       | <b>RT</b>   | -6.0 | -9.3 | 11.5 | 0.7  | <b>17.6</b> | 10.4        |  |  | <±15 | <±15 | <±15 |  |  |  |  |
|       | <b>+37°</b> |      |      |      |      |             |             |  |  | <±15 |      |      |  |  |  |  |
|       | <b>+60°</b> | 2.3  | -2.3 | 6.3  | -8.0 | <b>16.3</b> | <b>28.1</b> |  |  |      |      |      |  |  |  |  |

**Legend:** **d)** days; **w)** weeks; **m)** months; **QC low)** low level Quality Control; **QC high)** high level Quality Control. **Red bold numbers** represent numbers exceeding allowable stability limit (<±15). Data are expressed as mean percentage difference in concentration with respect to day 1.

Table S1c: Summary of CBD stability studies

| Analyte           | T (°C) | Percentage difference from day 1 (%)           |                                                |                        |                        |                        |                        |                       |                       |                                |          |          |          |          |          |          |          |
|-------------------|--------|------------------------------------------------|------------------------------------------------|------------------------|------------------------|------------------------|------------------------|-----------------------|-----------------------|--------------------------------|----------|----------|----------|----------|----------|----------|----------|
|                   |        | Moorthy, G.S. et al, 2019 [23]                 |                                                |                        |                        |                        |                        |                       |                       | Pigliasco, F. et al, 2020 [24] |          |          |          |          |          |          |          |
|                   |        | 1 w                                            |                                                | 2 w                    |                        | 1 mo                   |                        | 2 mo                  |                       | 1 w                            |          | 2 w      |          | 3 w      |          | 4 w      |          |
|                   |        | QC low                                         | QC high                                        | QC low                 | QC high                | QC low                 | QC high                | QC low                | QC high               | LLOQ                           | QC high  | LLOQ     | QC high  | LLOQ     | QC high  | LLOQ     | QC high  |
| Cannabidiol (CBD) | -78°   |                                                |                                                | 94.6 ± 9.93 (envelope) | 92.6 ± 4.64 (envelope) |                        |                        | 106 ± 3.04 (autorack) | 109 ± 4.18 (autorack) |                                |          |          |          |          |          |          |          |
|                   | -20°   |                                                |                                                | 92.4 ± 5.36 (envelope) | 100 ± 10.2 (envelope)  | 101 ± 5.08 (autorack)  | 113 ± 0.658 (autorack) |                       |                       | 91% (6%)                       | 92% (7%) | 99% (8%) | 97% (6%) | 98% (4%) | 99% (3%) | 99% (3%) | 98% (8%) |
|                   | +4°    |                                                |                                                | 90.2 ± 11.4 (envelope) | 101 ± 8.13 (envelope)  | 80.1 ± 22.3 (autorack) | 86.9 ± 3.66 (autorack) |                       |                       |                                |          |          |          |          |          |          |          |
|                   | RT     |                                                |                                                | 105 ± 8.07 (envelope)  | 89.2 ± 7.18 (envelope) | 112 ± 6.13 (autorack)  | 116 ± 5.12 (autorack)  |                       |                       | 97% (8%)                       | 94% (1%) | 94% (6%) | 91% (4%) | 98% (4%) | 90% (3%) | 97% (6%) | 91% (8%) |
|                   | +40°   | 112 ± 5.42 (envelope)<br>111 ± 5.85 (autorack) | 107 ± 5.92 (envelope)<br>105 ± 5.63 (autorack) |                        |                        |                        |                        |                       |                       |                                |          |          |          |          |          |          |          |

**Legend:** **w)** weeks; **m)** months; **LLOQ)** Quality control set at lower level of quantification; **QC low)** low level Quality Control; **QC high)** high level Quality Control. **Red bold numbers** represent numbers exceeding allowable stability limit (<±15). Data are expressed as: Accuracy±CV(%) in ref [23] and accuracy and CV percentage in ref [24]. Stability data in [23] were obtained either putting VAMS in a transport bag (envelope) or in a VAMS dedicated storage rack (autorack).
